# Supplementary material for: Detecting long-term changes in point source fossil CO 2 emissions with tree ring archives
Source: Copernicus journal article supplement (doi:10.5194/acp-2015-919), 2016-01-19
Supplement: Supplementary file 1 [file acp-2015-919-supplement.pdf]

Table S1. Annual average emission rates of CO<sub>2</sub>ff at Vector and Ballance plants.

| Year<br>(Sept-Apr)    | Vector<br>(gC s <sup>-1</sup> ) | Ballance<br>(gC s <sup>-1</sup> ) | Total<br>(gC s <sup>-1</sup> ) |
|-----------------------|---------------------------------|-----------------------------------|--------------------------------|
| 2004                  | 5328                            | 1576                              | 6904                           |
| 2005                  | 5711                            | 1601                              | 7312                           |
| 2006                  | 5714                            | 1728                              | 7441                           |
| 2007                  | 4611                            | 1627                              | 6238                           |
| 2008                  | 4968                            | 1355                              | 6323                           |
| 2009                  | 5654                            | 1642                              | 7296                           |
| 2010                  | 5436                            | 1683                              | 7119                           |
| 2011                  | 5300                            | 884                               | 6184                           |
| Mean                  | 5340                            | 1512                              | 6852                           |
| Standard<br>Deviation | 388 (7.3%)                      | 88 (18%)                          | 525 (7.7%)                     |

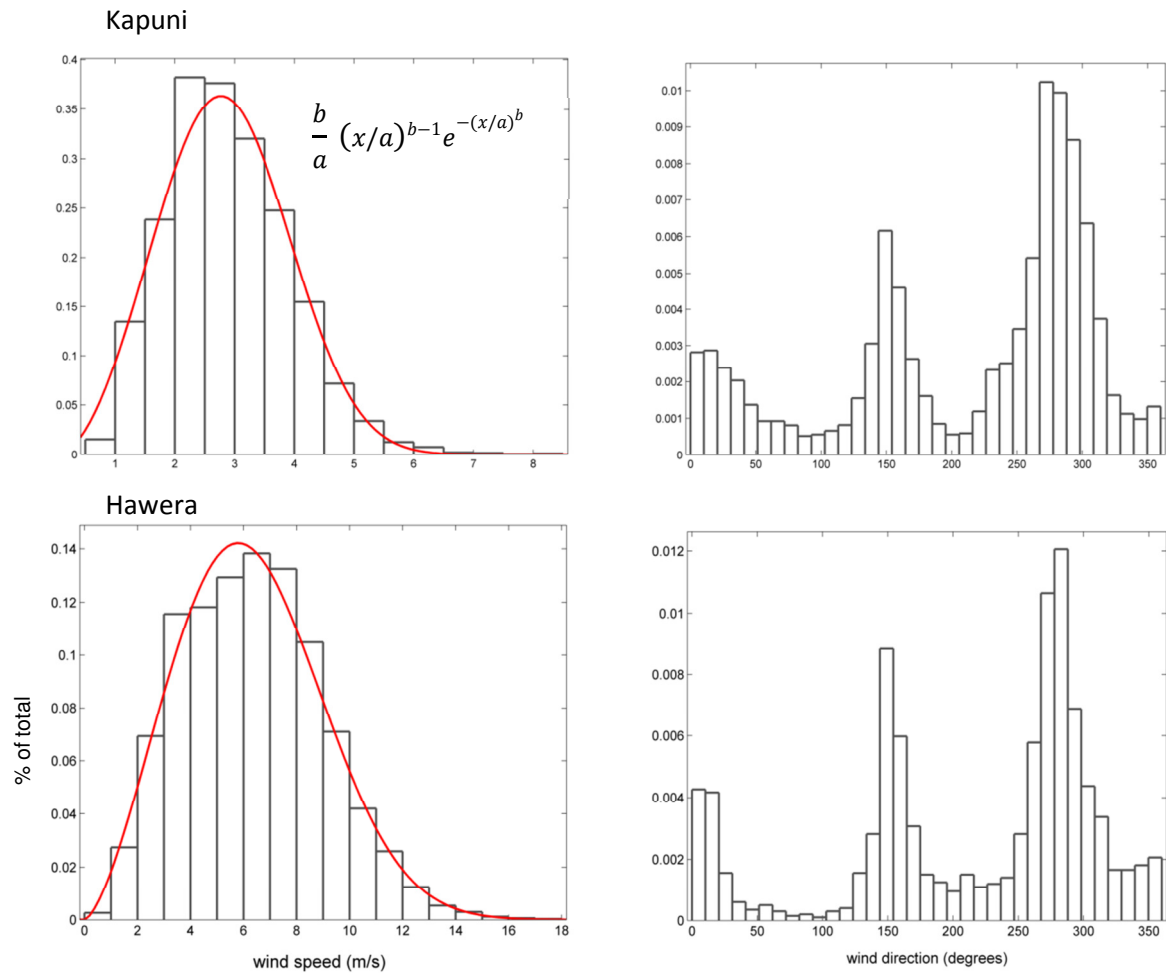

Figure S1. Wind speed (left) and direction (right) histograms and fitted Weibull probability distribution function (PDF) for (top) Kapuni 2013 ( $a = 3.19$   $b = 2.95$ ; mean = 2.85 median = 2.7) and (bottom) all 8 years 2004-2011 at Hawera (Mean = 6.31 median = 6.2 std = 2.7 (43%)). Top left panel shows the equation of the Weibull PDF.

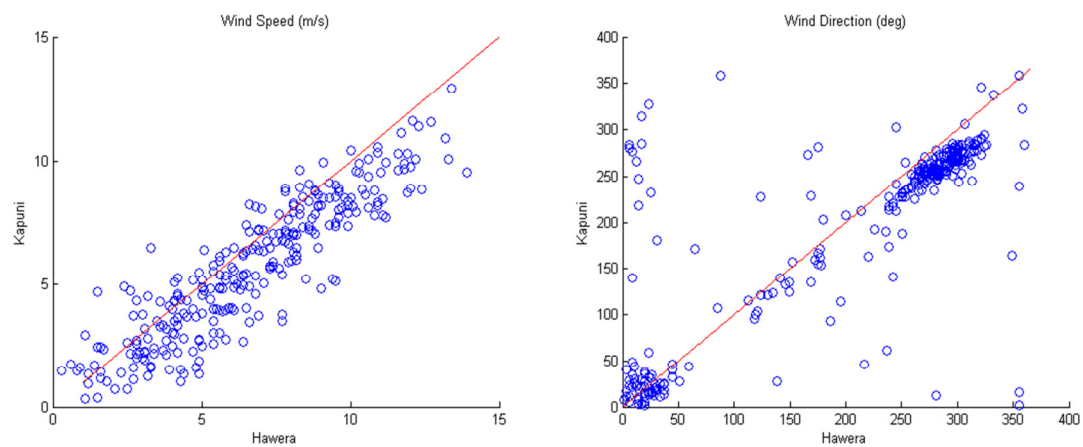

Figure S2. Wind speed (left) and wind direction (right) compared at each corresponding hourly time step at Kapuni and Hawera. Data from both sites spans 14 August - 26 October 2012.

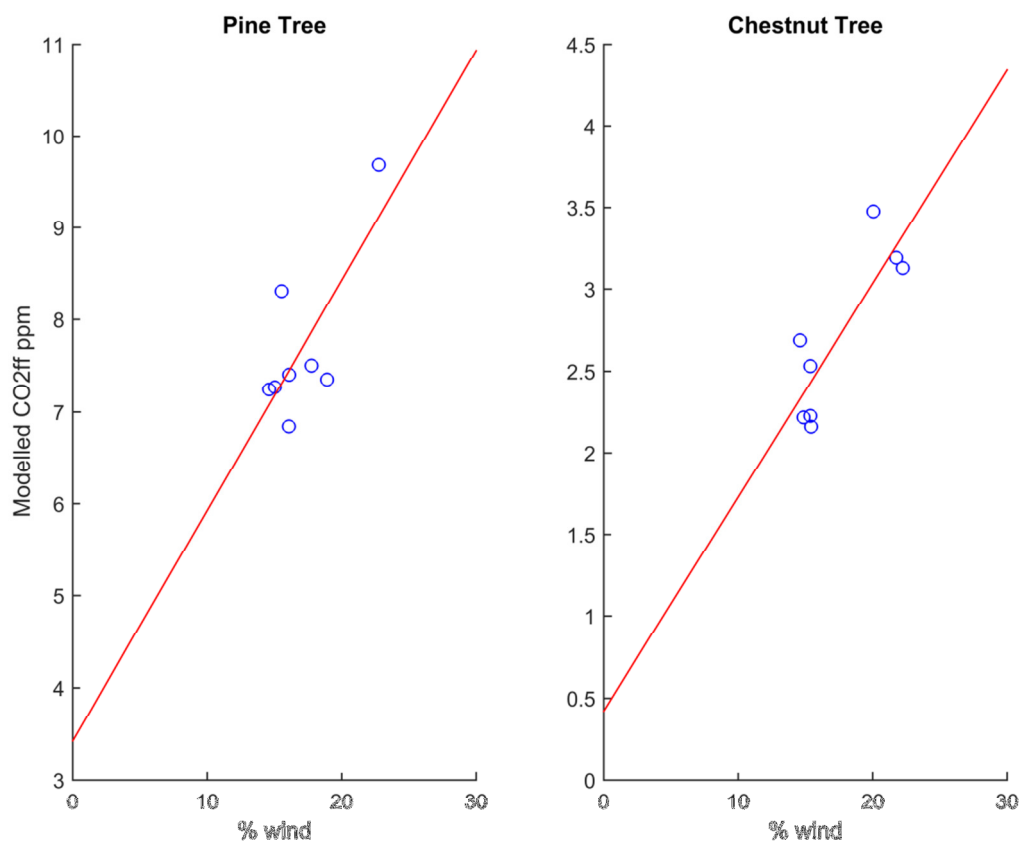

Figure S3. Correlation between % of northerlies in each year and modelled CO<sub>2</sub>ff (constant emissions) at the locations of the pine and chestnut trees.  $R^2 = 0.56$  (pine) and 0.72 (chestnut). Red line is a linear regression fit of the data.
